# Supplementary material for: Favorable Prognosis in Patients with Recovered Pulmonary Hypertension after TAVI: An Analysis of the LAPLACE-TAVI Registry
Source: MDPI journal article supplement (doi:10.3390/jcm12020729), 2023-01-16
Supplement: s1 [file s1]

**Supplementary Table S1:** Univariate Cox proportional hazard analyses for predictors of CV-death and heart failure hospitalization following TAVI

|                                              | HR   | 95% CI    | p-value       |
|----------------------------------------------|------|-----------|---------------|
| Age (1 year older)                           | 1.02 | 0.99-1.06 | 0.24          |
| Male                                         | 1.19 | 0.79-1.80 | 0.40          |
| BMI <sup>1</sup> (1kg/m <sup>2</sup> higher) | 0.97 | 0.92-1.02 | 0.28          |
| Hypertension                                 | 0.95 | 0.59-1.54 | 0.83          |
| Diabetes mellitus                            | 1.69 | 1.10-2.59 | <b>0.0160</b> |
| Dyslipidemia                                 | 0.78 | 0.53-1.16 | 0.22          |
| AF/AFL <sup>2</sup>                          | 1.66 | 1.10-2.50 | <b>0.0162</b> |
| History of coronary revascularization        | 1.07 | 0.66-1.73 | 0.77          |
| History of cancer                            | 1.54 | 0.98-2.44 | 0.06          |
| History of stroke                            | 2.31 | 1.37-3.91 | <b>0.0017</b> |
| History of heart failure hospitalization     | 1.21 | 0.77-1.90 | 0.41          |
| COPD <sup>3</sup>                            | 1.11 | 0.59-2.07 | 0.75          |
| PAD <sup>4</sup>                             | 1.69 | 1.10-2.59 | <b>0.0158</b> |
| OMI <sup>5</sup>                             | 1.05 | 0.43-2.58 | 0.92          |
| Pulmonary dysfunction                        | 1.00 | 0.65-1.53 | 1.00          |
| PTAV <sup>6</sup>                            | 1.62 | 0.75-3.53 | 0.22          |
| PMI <sup>7</sup>                             | 1.99 | 1.13-3.50 | <b>0.0168</b> |
| LVEF <sup>8</sup> (%) (1 SD higher)          | 0.94 | 0.77-1.15 | 0.52          |
| AVA (cm <sup>2</sup> ) (1 SD higher)         | 1.01 | 0.81-1.25 | 0.93          |
| Peak gradient (mmHg) (1 SD higher)           | 0.89 | 0.73-1.08 | 0.24          |
| Mean gradient (mmHg) (1 SD higher)           | 0.88 | 0.71-1.08 | 0.23          |
| TRPG (mmHg) (10 mmHg lower)                  | 0.82 | 0.70-0.95 | <b>0.0095</b> |
| Beta-blockers                                | 1.12 | 0.76-1.66 | 0.56          |
| ACEIs <sup>9</sup> /ARBs <sup>10</sup>       | 0.80 | 0.54-1.19 | 0.27          |
| Statins                                      | 0.86 | 0.58-1.27 | 0.44          |
| Diuretics                                    | 1.36 | 0.91-2.03 | 0.14          |

|                                                               |      |           |               |
|---------------------------------------------------------------|------|-----------|---------------|
| Oral anticoagulants                                           | 1.43 | 0.95-2.14 | 0.08          |
| Hemoglobin (g/dL) (1 SD higher)                               | 0.73 | 0.59-0.90 | <b>0.0033</b> |
| eGFR <sup>11</sup> (mL/min/1.73m <sup>2</sup> ) (1 SD higher) | 0.74 | 0.60-0.91 | <b>0.0051</b> |
| Albumin (mg/dL) (1 SD higher)                                 | 0.75 | 0.61-0.93 | <b>0.0071</b> |
| Log NT-proBNP <sup>12</sup> (pg/ml) (1 SD higher)             | 1.57 | 1.25-1.97 | <b>0.0001</b> |

1 body mass index, 2 atrial fibrillation or flutter 3 chronic obstructive pulmonary disease 4 peripheral artery disease 5 old myocardial infarction 6 percutaneous transcatheter aortic valvuloplasty 7 pacemaker implantation 8 left ventricular ejection fraction, 9 angiotensin converting enzyme inhibitors, 10 angiotensin II receptor blockers, 11 estimated glomerular filtration rate, 12 N-terminal pro B-type natriuretic peptide

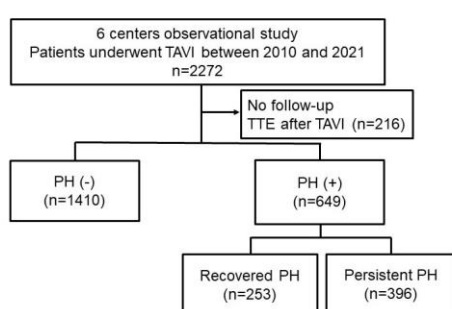

Figure S1: Consort diagram of the study

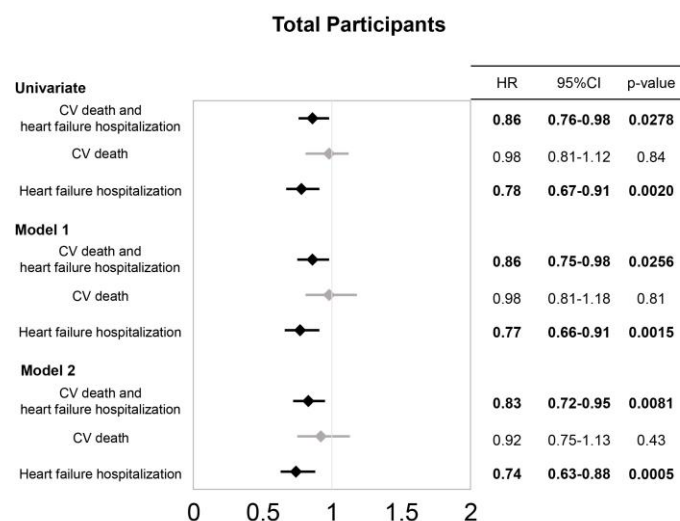

Figure S2: Hazard ratios of TRPG in all participants derived from univariate and multivariable Cox proportional hazard analyses
